# Supplementary material for: Dispersion-based, scalable fabrication of repellent superhydrophobic and liquid-infused coatings under ambient conditions
Source: Royal Society of Chemistry journal article supplement (doi:10.1039/d2gc00579d), 2022-01-01
Supplement: d2gc00579d1.pdf [file d2gc00579d1.pdf]

Supporting Information for the manuscript:

DISPERSION-BASED, SCALABLE  
FABRICATION OF REPELLENT  
SUPERHYDROPHOBIC AND LIQUID-  
INFUSED COATINGS AT AMBIENT  
CONDITIONS

*TERESA WALTER<sup>1</sup>, TAMARA HEIN<sup>1</sup>, MATTHIAS WEICHSELGARTNER<sup>2</sup>, KIRSTEN  
WOMMER<sup>2</sup>, MARTIN AUST<sup>2</sup> AND NICOLAS VOGEL<sup>1\*</sup>*

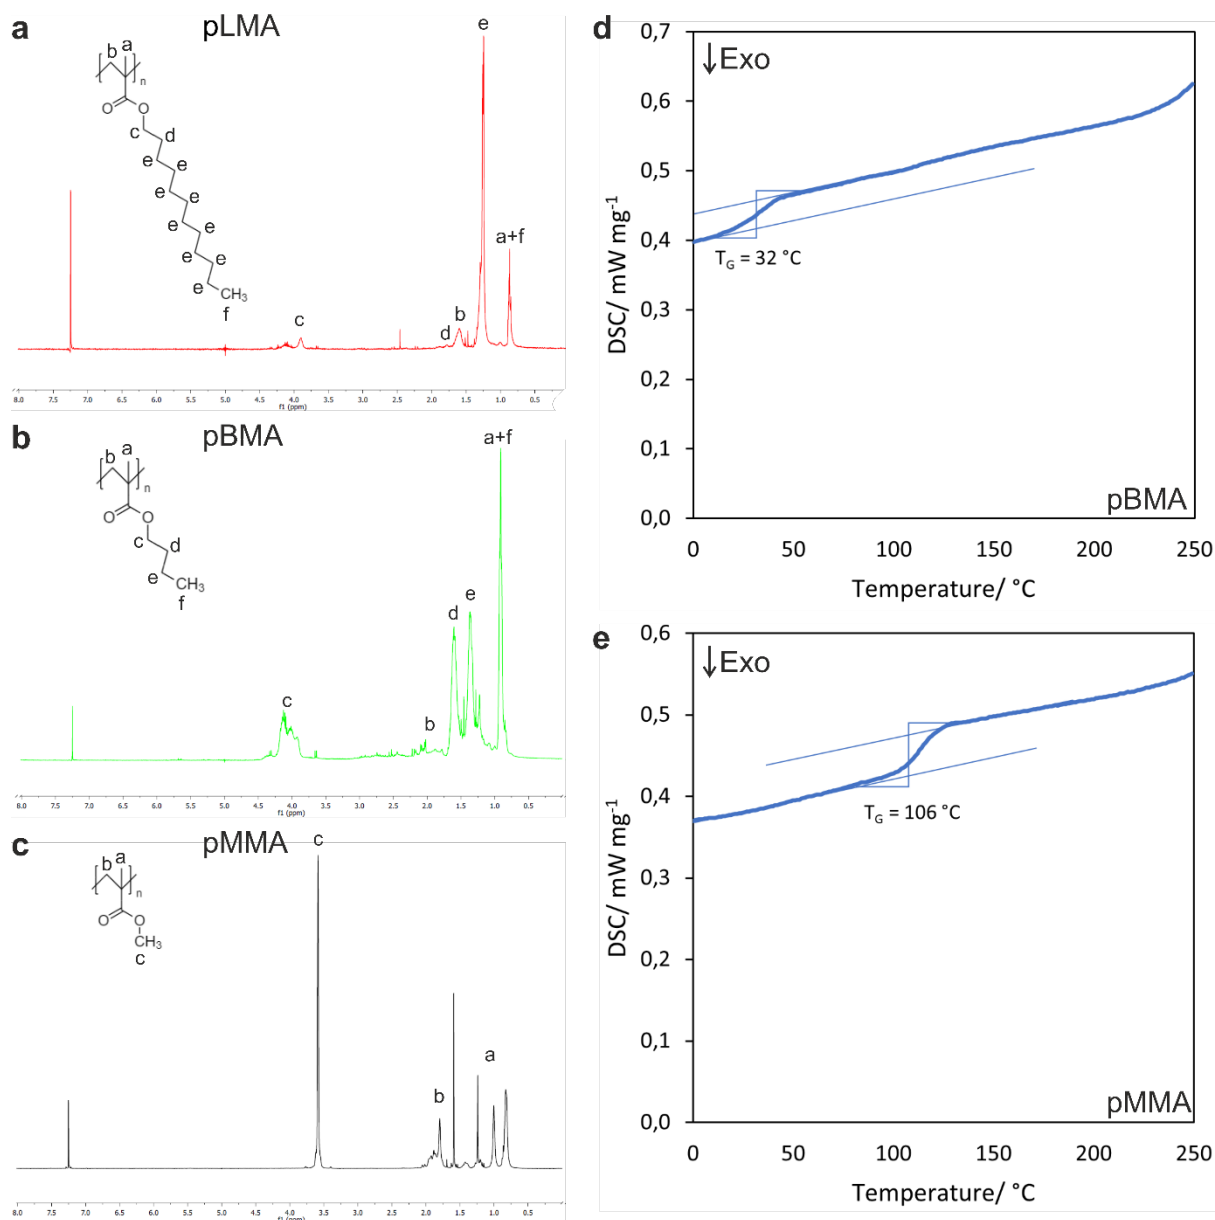

Figure SI 1: Chemical structure and glass transition temperature of the synthesized colloidal polymeric particles: <sup>1</sup>H NMR spectra for (a) pLMA, (b) pBMA, (c) pMMA and DSC measurements for (d) pBMA and (e) pMMA. The NMR results match well to other reported spectra of the polymers.<sup>1–3</sup> Note that the DSC spectra for pLMA did not show any features as the glass transition is below the temperature range of the instrument.

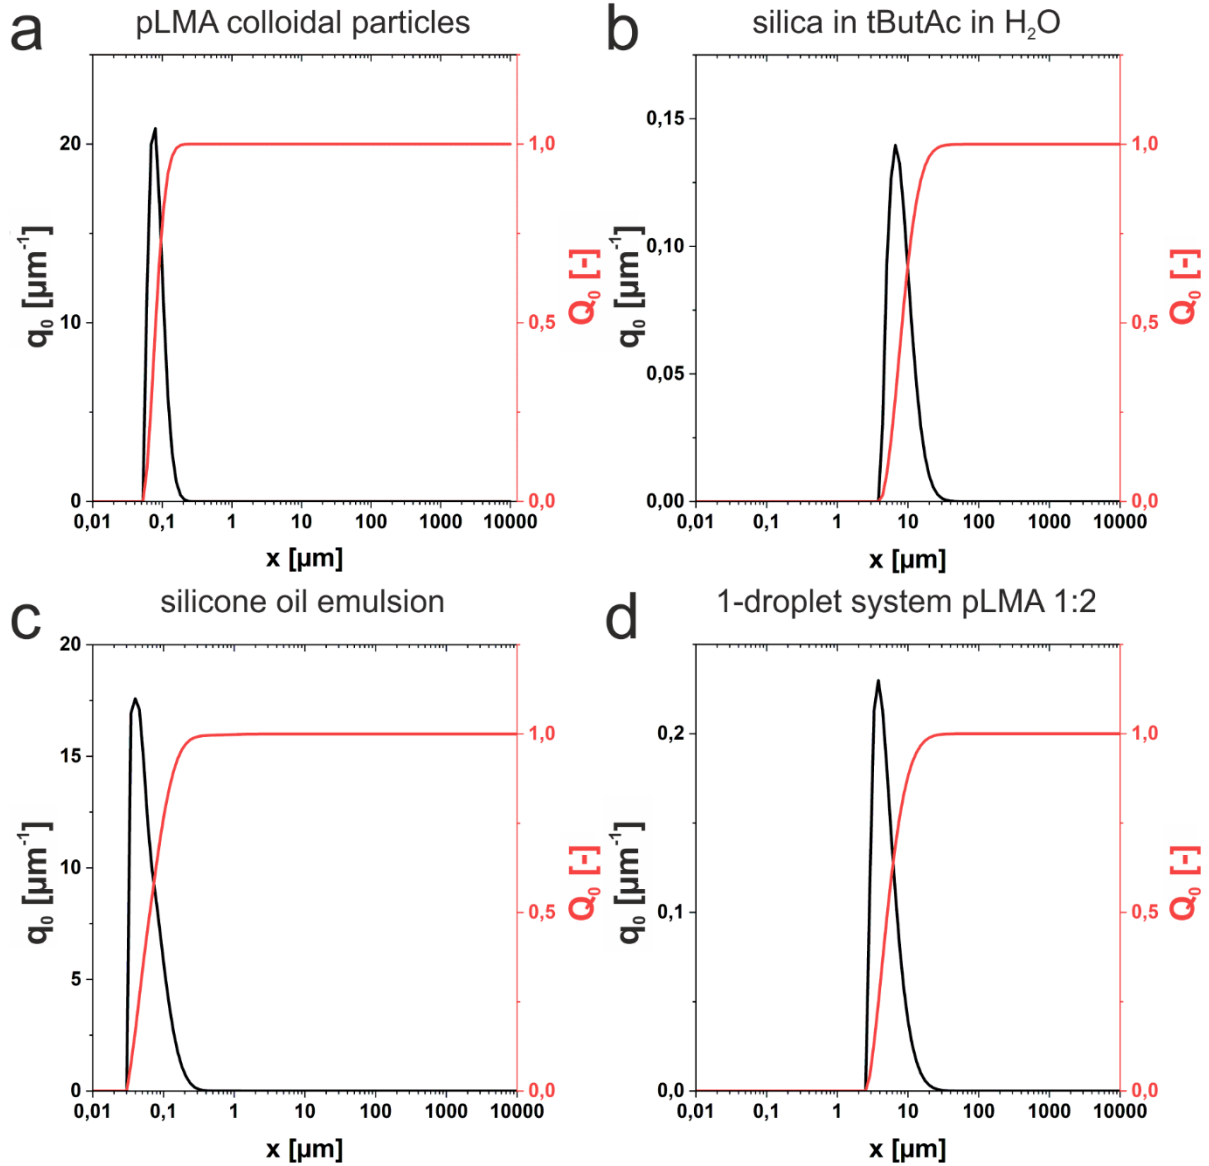

Figure SI 2: Size distributions of the individual particle components and coatings systems: a) Colloidal poly lauryl methacrylate particles in water synthesized via miniemulsion polymerization. b) Emulsion of microdroplets in water containing fumed silica dispersed in tert-butyl acetate as part of the 2-droplet coating system. c) Nanodroplets of silicone oil emulsion in water to infiltrate the superhydrophobic coatings. d) Emulsion of microdroplets containing 1-droplet system of poly lauryl methacrylate with 1:2 polymer to silica ratio in tert-butyl acetate.

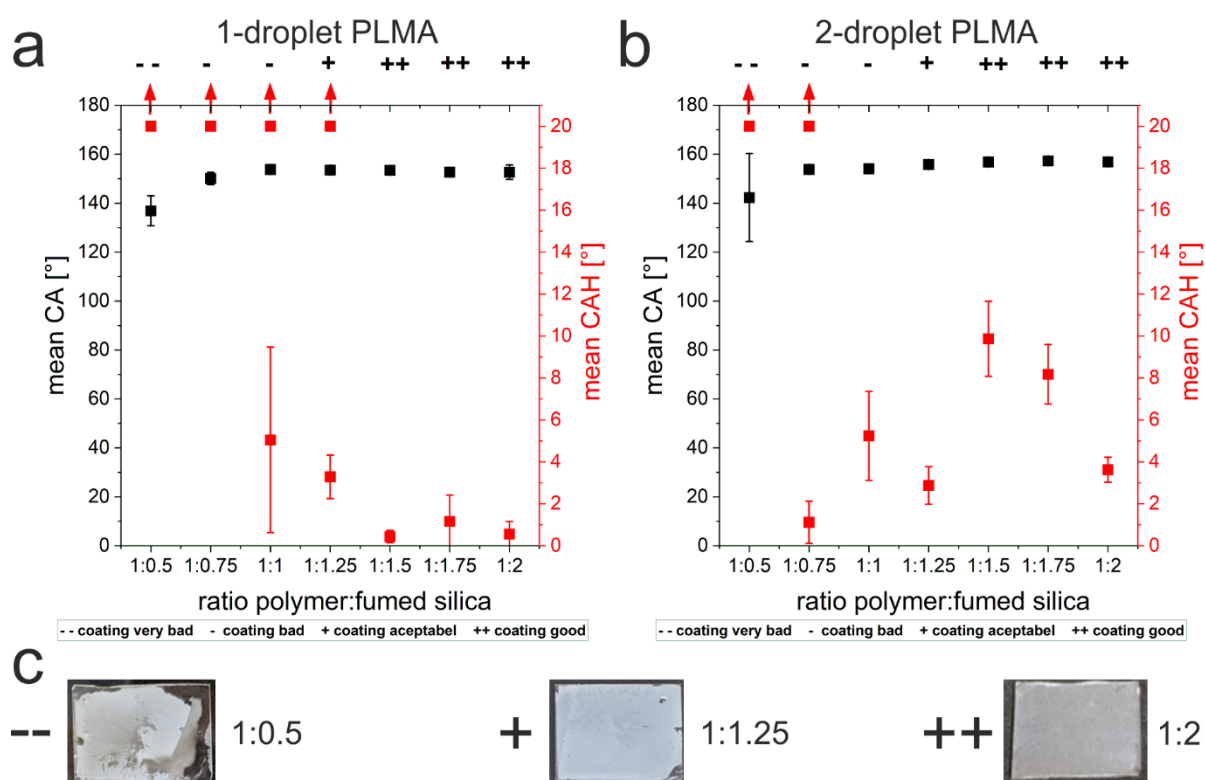

Figure SI 3: Film formation and wetting behavior of coatings based on the 1-droplet or 2-droplet systems with different polymer to silica ratios. a) Exemplary mean water contact angles (CA), contact angle hysteresis (CAH) and film formation evaluation of 1-droplet systems with poly lauryl methacrylate. b) Exemplary mean CAs, CAHs and film formation evaluation of 2-droplet systems with poly lauryl methacrylate. c) Photographs demonstrating the evaluation of film formation quality, shown for the 1-droplet systems at well-selected polymer to silica ratios

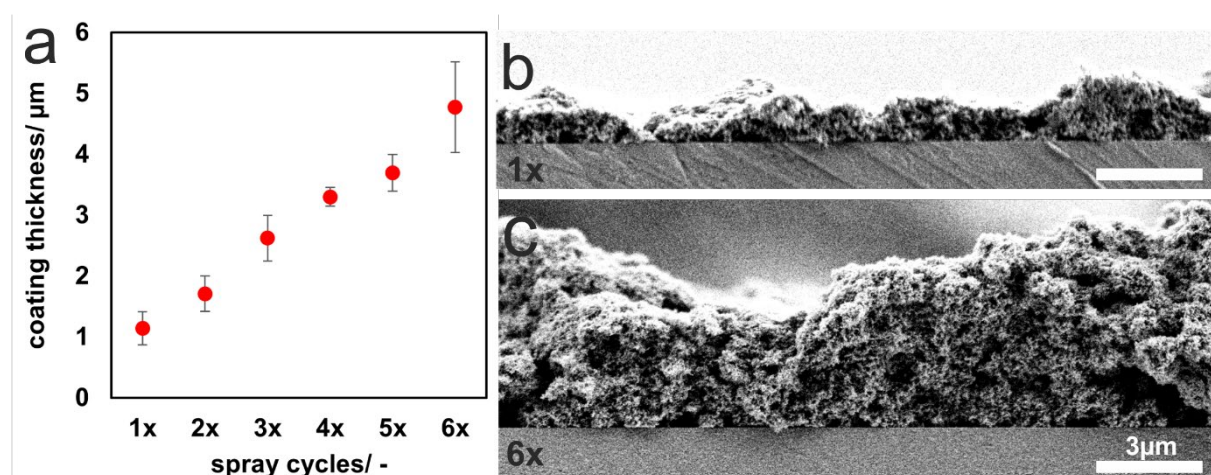

Figure SI 4: Thickness of the prepared coatings as a function of the applied spray cycles (a). The average thickness was determined from SEM sideview images. Exemplary sideview images after 1x spraying (b) and 6x spraying (c)

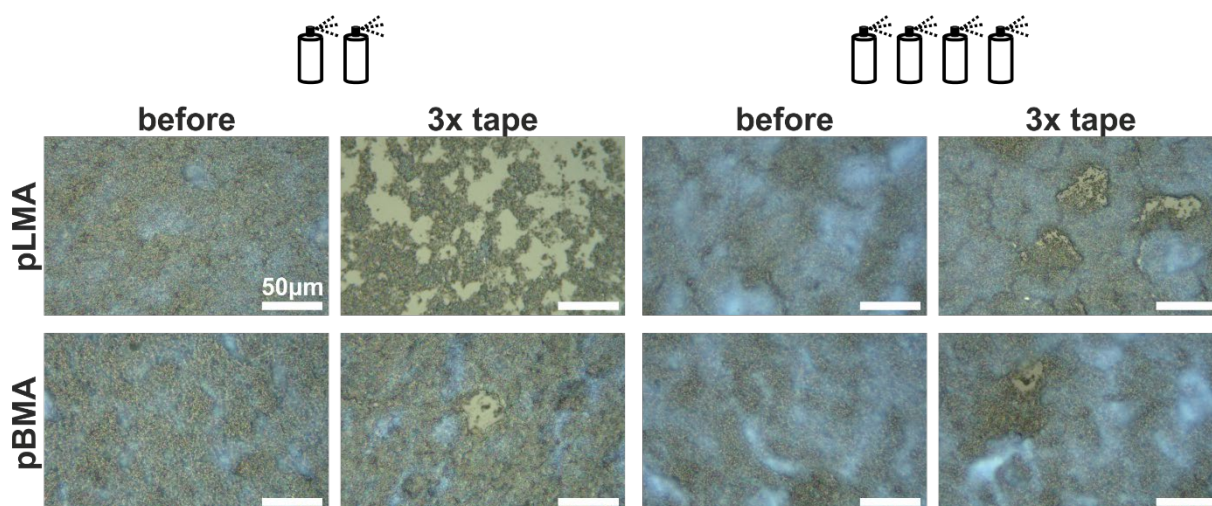

Figure SI 5: Optical microscope images before and after three tape cycles for the 1-droplet pLMA (top) and pBMA (bottom) systems. Exemplary samples were prepared with two (left) and four (right) spray cycles.

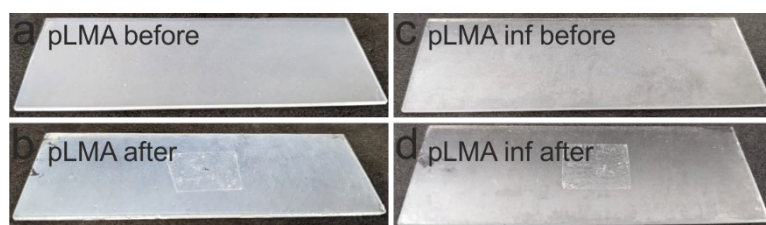

Figure SI 6: Exemplary photographs of superhydrophobic (left) and liquid-infused (right) coatings before (a+c) and after 10 aging cycles (b+d). The coatings were prepared by the 1-droplet system.

#### References:

- 1 K. Hatada, T. Nishiura, T. Kitayama, K. Ute and S. Hirotsu, *Polym. J.*, 1996, **28**, 185–188.
- 2 V. Strehmel, A. Laschewsky, H. Wetzel and E. Görnitz, *Macromolecules*, 2006, **39**, 923–930.
- 3 A. Iborra, G. Díaz, D. López, J. M. Giusti and O. Azzaroni, *Eur. Polym. J.*, 2017, **87**, 308–317.
